# Supplementary material
Source: PubMed Central journal article supplement (PMC5710202)
Supplement: jamaophthalmol-135-734-s001.pdf [file jamaophthalmol-135-734-s001.pdf]

## Supplementary Online Content

Diniz-Filho A, Delano-Wood L, Daga FB, Cronemberger S, Medeiros FA. Association between neurocognitive decline and visual field variability in glaucoma. *JAMA Ophthalmol*. Published online May 18, 2017. doi:10.1001/jamaophthalmol.2017.1279

### **eFigure.** Montreal Cognitive Assessment (MoCA) Test

This supplementary material has been provided by the authors to give readers additional information about their work.

**eFigure.** Montreal Cognitive Assessment (MoCA) Test

**MONTREAL COGNITIVE ASSESSMENT (MOCA)**  
Version 7.1 Original Version

**NAME:** \_\_\_\_\_  
**Education:** \_\_\_\_\_  
**Sex:** \_\_\_\_\_

**Date of birth:** \_\_\_\_\_  
**DATE:** \_\_\_\_\_

| VISUOSPATIAL / EXECUTIVE |  | Copy cube                                                                                                                |  |                                                                                                                            |          |                            | Draw CLOCK (Ten past eleven)<br>(3 points)                                                       |          |                                | POINTS |       |  |
|--------------------------|--|--------------------------------------------------------------------------------------------------------------------------|--|----------------------------------------------------------------------------------------------------------------------------|----------|----------------------------|--------------------------------------------------------------------------------------------------|----------|--------------------------------|--------|-------|--|
|                          |  |                                                                                                                          |  |                                                                                                                            |          |                            | <input type="checkbox"/> Contour <input type="checkbox"/> Numbers <input type="checkbox"/> Hands |          |                                |        | ___/5 |  |
| NAMING                   |  |                                                                                                                          |  |                                                                                                                            |          |                            |                                                                                                  |          |                                |        |       |  |
|                          |  |                                                                                                                          |  |                                                                                                                            |          |                            |                                                                                                  |          |                                |        | ___/3 |  |
| MEMORY                   |  | Read list of words, subject must repeat them. Do 2 trials, even if 1st trial is successful. Do a recall after 5 minutes. |  | FACE                                                                                                                       | VELVET   | CHURCH                     | DAISY                                                                                            | RED      | No points                      |        |       |  |
|                          |  | 1st trial                                                                                                                |  |                                                                                                                            |          |                            |                                                                                                  |          |                                |        |       |  |
|                          |  | 2nd trial                                                                                                                |  |                                                                                                                            |          |                            |                                                                                                  |          |                                |        |       |  |
| ATTENTION                |  | Read list of digits (1 digit/ sec.).                                                                                     |  | Subject has to repeat them in the forward order                                                                            |          | [ ] 2 1 8 5 4              |                                                                                                  | ___/2    |                                |        |       |  |
|                          |  |                                                                                                                          |  | Subject has to repeat them in the backward order                                                                           |          | [ ] 7 4 2                  |                                                                                                  |          |                                |        |       |  |
|                          |  | Read list of letters. The subject must tap with his hand at each letter A. No points if ≥ 2 errors                       |  | [ ] FBACMNAAJKLBAFAKDEAAAJAMOF AAB                                                                                         |          |                            |                                                                                                  |          |                                |        | ___/1 |  |
|                          |  | Serial 7 subtraction starting at 100                                                                                     |  | [ ] 93                                                                                                                     | [ ] 86   | [ ] 79                     | [ ] 72                                                                                           | [ ] 65   | ___/3                          |        |       |  |
|                          |  |                                                                                                                          |  | 4 or 5 correct subtractions: <b>3 pts</b> , 2 or 3 correct: <b>2 pts</b> , 1 correct: <b>1 pt</b> , 0 correct: <b>0 pt</b> |          |                            |                                                                                                  |          |                                |        |       |  |
| LANGUAGE                 |  | Repeat: I only know that John is the one to help today. [ ]                                                              |  | The cat always hid under the couch when dogs were in the room. [ ]                                                         |          |                            |                                                                                                  |          |                                |        | ___/2 |  |
|                          |  | Fluency / Name maximum number of words in one minute that begin with the letter F                                        |  | [ ] _____ (N ≥ 11 words)                                                                                                   |          |                            |                                                                                                  |          |                                |        | ___/1 |  |
| ABSTRACTION              |  | Similarity between e.g. banana - orange = fruit                                                                          |  | [ ] train - bicycle                                                                                                        |          | [ ] watch - ruler          |                                                                                                  |          |                                |        | ___/2 |  |
| DELAYED RECALL           |  | Has to recall words WITH NO CUE                                                                                          |  | FACE                                                                                                                       | VELVET   | CHURCH                     | DAISY                                                                                            | RED      | Points for UNCUEDE recall only |        | ___/5 |  |
|                          |  | Category cue                                                                                                             |  |                                                                                                                            |          |                            |                                                                                                  |          |                                |        |       |  |
|                          |  | Multiple choice cue                                                                                                      |  |                                                                                                                            |          |                            |                                                                                                  |          |                                |        |       |  |
| ORIENTATION              |  | [ ] Date                                                                                                                 |  | [ ] Month                                                                                                                  | [ ] Year | [ ] Day                    | [ ] Place                                                                                        | [ ] City | ___/6                          |        |       |  |
| © Z.Nasreddine MD        |  | www.mocatest.org                                                                                                         |  | Normal ≥ 26 / 30                                                                                                           |          | TOTAL                      |                                                                                                  | ___/30   |                                |        |       |  |
| Administered by: _____   |  |                                                                                                                          |  |                                                                                                                            |          | Add 1 point if ≤ 12 yr edu |                                                                                                  |          |                                |        |       |  |

Montreal Cognitive Assessment (MoCA) test is a cognitive screening tool developed to detect mild cognitive dysfunction. It assesses different cognitive domains: attention and concentration, executive functions, memory, language, visuoconstructional skills, conceptual thinking, calculations, and orientation. The total possible score is 30 points, and a score of 26 or above is considered normal.
